# Supplementary material
Source: MDPI journal article supplement (https://www.mdpi.com/2227-9040/11/6/329)
Supplement: s1 [file s1 › chemosensors-2352236-supplementary.pdf]

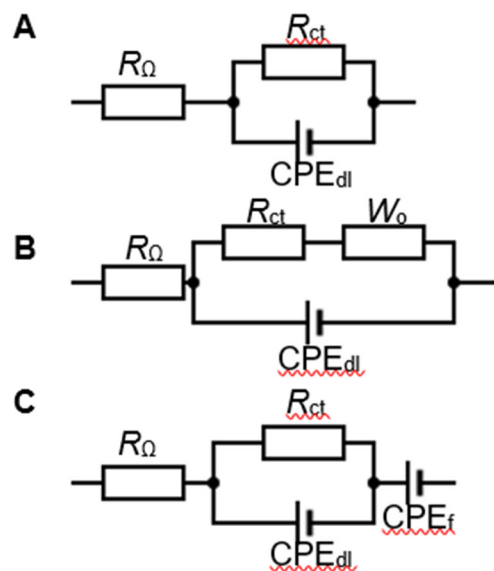

**Figure S1.** Equivalent circuits used to analyse EIS spectra: **(A)** – “simple” circuit for analysis at LIG355, **(B)** – Randles circuit for LIG532, **(C)** – circuit for some modified LIG532 electrodes.

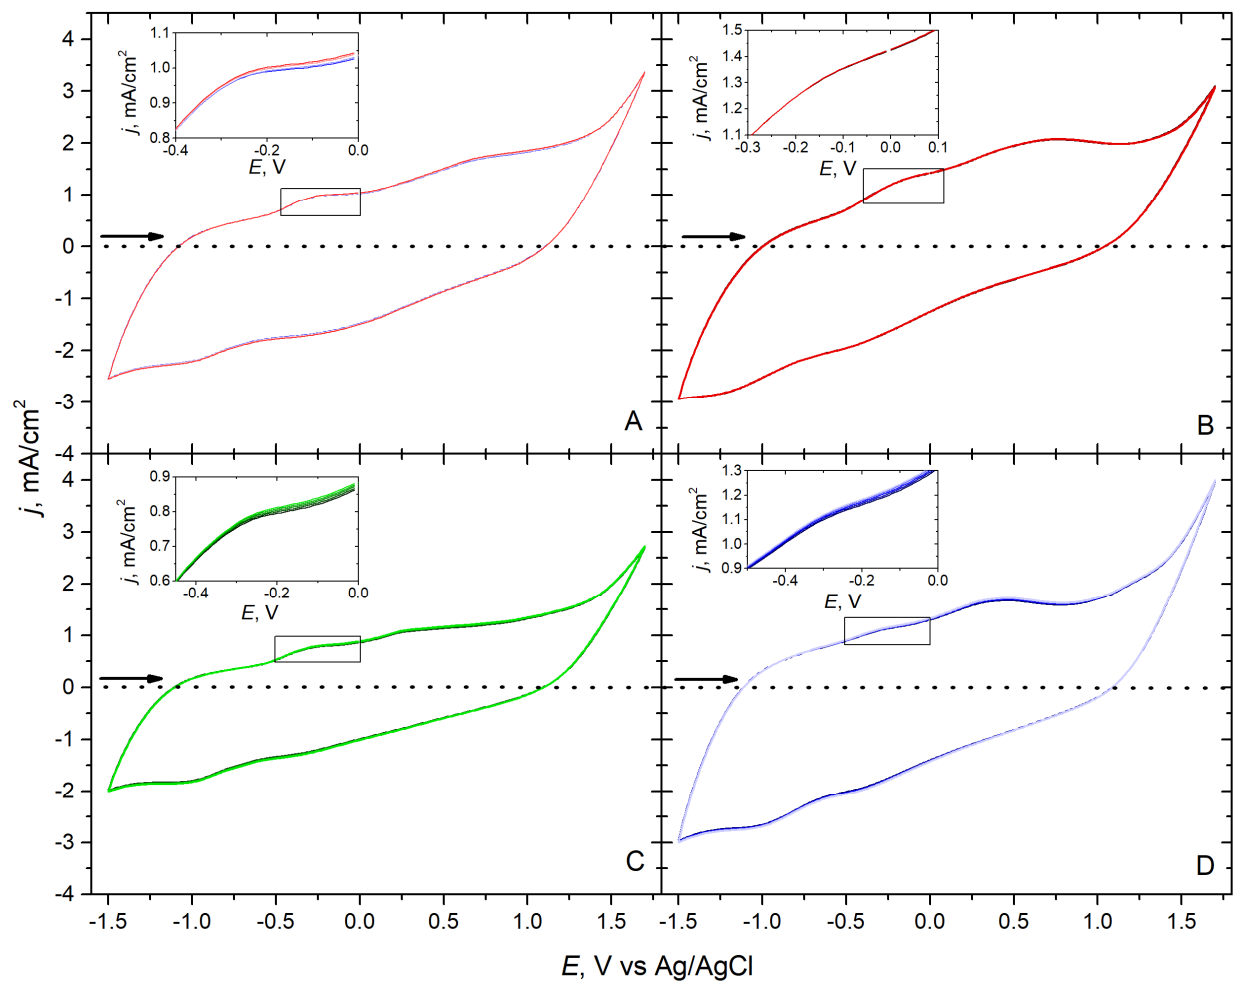

**Figure S2.** Last 5 cycles of FA electropolymerisation presented in Figure 6 at LIG355 (A), Chit/LIG355 (B), LIG532 (C) and Chit/LIG532 (D) indicating steady-state current. Insets show a zoom of oxidation current. All other conditions like in Figure 6.

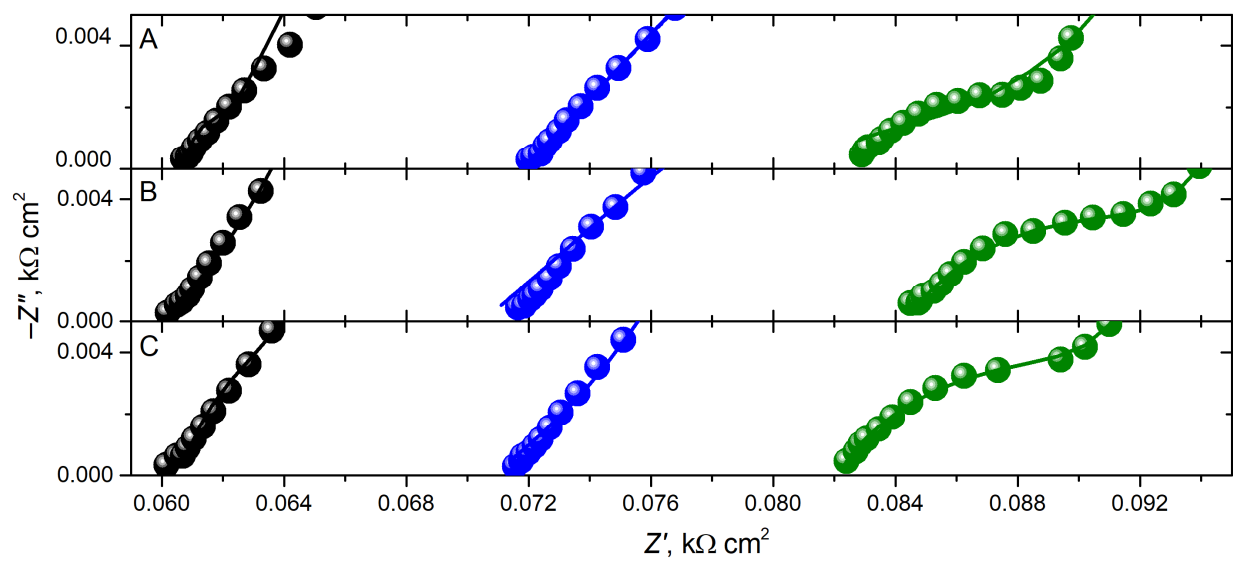

**Figure S3.** Beginnings of complex plane spectra at LIG532 (black symbols), Chit/LIG532 (blue symbols) and PFA/Chit/LIG532 (green symbols) in 0.1 M PBS solution of pH 7.0, at different potentials:  $-0.74$  V (**A**),  $0.0$  V (**B**) and  $+0.43$  V (**C**).

**Table S1.** Warburg element parameters calculated at LIG532 from Figure 5F using an equivalent circuit depicted in Figure S1B.

| $E, \text{V}$ | $R_{\text{dif}}, \Omega \text{ cm}^2 (W_0)$ | $\tau, \text{s} (W_0)$ | $\alpha (W_0)$ |
|---------------|---------------------------------------------|------------------------|----------------|
| -1.50         | 707                                         | 4.63                   | 0.469          |
| 0.00          | 21.5                                        | 0.099                  | 0.443          |
| +1.30         | 77.6                                        | 15.4                   | 0.432          |

**Table S2.** Analysis of EIS spectra at modified LIG532 from Figure 11 using an equivalent circuit depicted in Figure S1C.

| Electrode       | $E, \text{ V}$ | $R_{\Omega},$<br>$\Omega \text{ cm}^2$ | $R_{ct},$<br>$\Omega \text{ cm}^2$ | $C_{dl},$<br>$\text{mF cm}^{-2}$ | $\alpha$ | $R_{dif},$<br>$\Omega \text{ cm}^2$ | $\tau, \text{ s}$ | $\alpha_1$ |
|-----------------|----------------|----------------------------------------|------------------------------------|----------------------------------|----------|-------------------------------------|-------------------|------------|
| LIG532          | -0.74          | 60.69                                  | 0.754                              | 0.221                            | 0.999    |                                     |                   |            |
| Chit/LIG532     |                | 73.3                                   | 362                                | 6.61                             | 1.00     | 490                                 | 4.29              | 0.468      |
| PFA/Chit/LIG532 |                | 80.6                                   | 10.1                               | 1.27                             | 0.989    | 509                                 | 1.41              | 0.440      |
| LIG532          | 0.00           | 60.6                                   | 4.96                               | 3.13                             | 0.916    |                                     |                   |            |
| Chit/LIG532     |                | 70.5                                   | 824                                | 1.01                             | 0.999    | 27.7                                | 0.056             | 0.460      |
| PFA/Chit/LIG532 |                | 84.4                                   | 9.95                               | 2.58                             | 0.964    |                                     |                   |            |
| LIG532          | +0.43          | 60.7                                   | 4.59                               | 0.520                            | 0.905    |                                     | 1.38              | 0.869      |
| Chit/LIG532     |                | 70.8                                   | 2657                               | 1.45                             | 0.960    | 27.9                                | 0.134             | 0.440      |
| PFA/Chit/LIG532 |                | 82.0                                   | 10.3                               | 1.39                             | 0.901    |                                     | 7.95              | 0.864      |

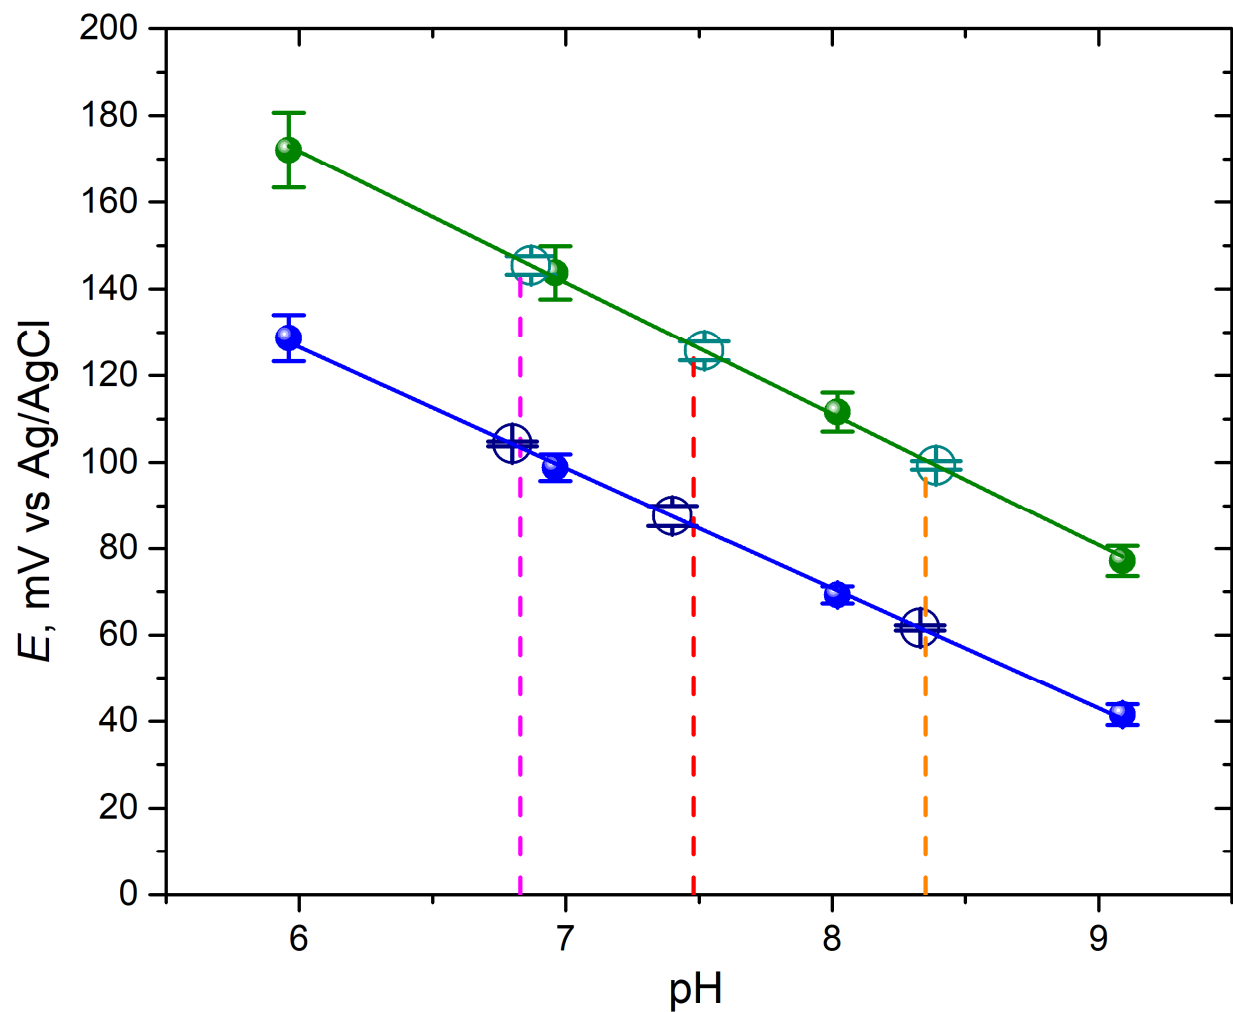

**Figure S4.** Validation of PFA/Chit/LIG355 (blue colour) and PFA/Chit/LIG532 (green colour) sensors in solutions with different pH using calibration plots ( $n=3$ ). Empty circles show detected pH in test solutions with the respective sensors and the dashed lines show values obtained with pH-meter: 6.83 pink (0.1 M KCl), 7.48 red (0.1 M PBS), and 8.35 orange (1 M Tris hydrochloride).
